# Supplementary material for: Investigation of the Biological Activities and Characterization of Bioactive Constituents of Ophiorrhiza rugosa var. prostrata (D.Don) & Mondal Leaves through In Vivo, In Vitro, and In Silico Approaches
Source: PubMed Central journal article supplement (PMC6480688; doi:10.3390/molecules24071367), 2019-04-08
Supplement: molecules-24-01367-s001.pdf [file molecules-24-01367-s001.pdf]

## Supplementary Material

Article

# Investigation of the Biological Activities and Characterization of Bioactive Constituents of *Ophiorrhiza rugosa* var. *prostrata* (D.Don) & Mondal Leaves through In Vivo, In Vitro, and In Silico Approaches

Md. Adnan <sup>1,2,†</sup>, Md. Nazim Uddin Chy <sup>3,4,†</sup>, A.T.M. Mostafa Kamal <sup>3,\*</sup>, Md Obyedul Kalam Azad <sup>1,5</sup>, Arkajyoti Paul <sup>4,6</sup>, Shaikh Bokhtear Uddin <sup>7</sup>, James W. Barlow <sup>8</sup>, Mohammad Omar Faruque <sup>7</sup>, Cheol Ho Park <sup>1</sup> and Dong Ha Cho <sup>1,\*</sup>

<sup>1</sup> Department of Bio-Health Technology, Kangwon National University, Chuncheon 24341, Korea; mdadnan1991.pharma@gmail.com (M.A.); azadokalam@gmail.com (M.O.K.A.); chpark@kangwon.ac.kr (C.H.P.)

<sup>2</sup> Senior Scientist, Rentia Plant Factory, Chuncheon 24341, Korea

<sup>3</sup> Department of Pharmacy, International Islamic University Chittagong, Chittagong 4318, Bangladesh; nazim107282@gmail.com

<sup>4</sup> Drug Discovery, GUSTO A Research Group, Chittagong 4000, Bangladesh; arka.bgctub@gmail.com (A.P.)

<sup>5</sup> Head of Research and Technology, Rentia Plant Factory, Chuncheon 24341, Korea

<sup>6</sup> Department of Microbiology, Jagannath University, Dhaka 1100, Bangladesh

<sup>7</sup> Ethnobotany and Pharmacognosy Lab, Department of Botany, University of Chittagong, Chittagong 4331, Bangladesh; bokhtear@cu.ac.bd (S.B.U.); omf@cu.ac.bd (M.O.F.)

<sup>8</sup> Department of Chemistry, Royal College of Surgeons in Ireland, Dublin, D02YN77, Ireland; jambarlow@rcsi.ie

† These authors contributed equally to this work

\* Correspondence: mostafa@pharm.iiuc.ac.bd (A.T.M.M.K.); chodh@kangwon.ac.kr (D.H.C.)

**A**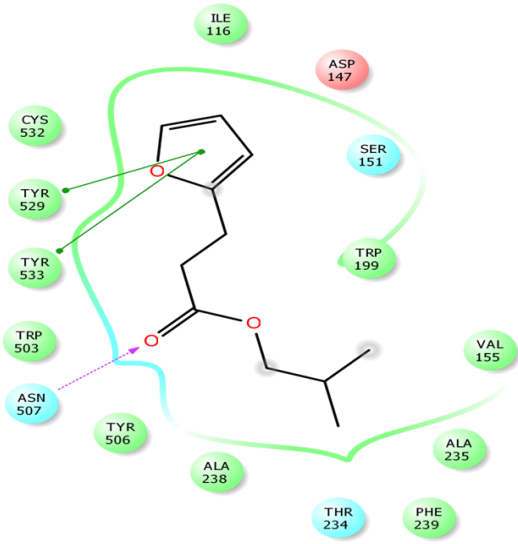**B**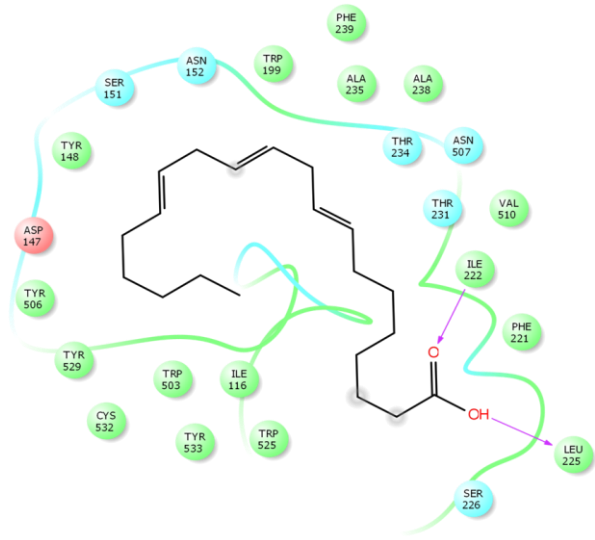**C**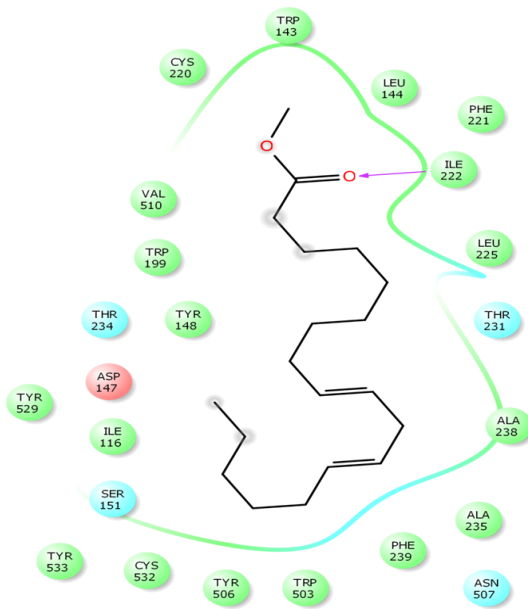**D**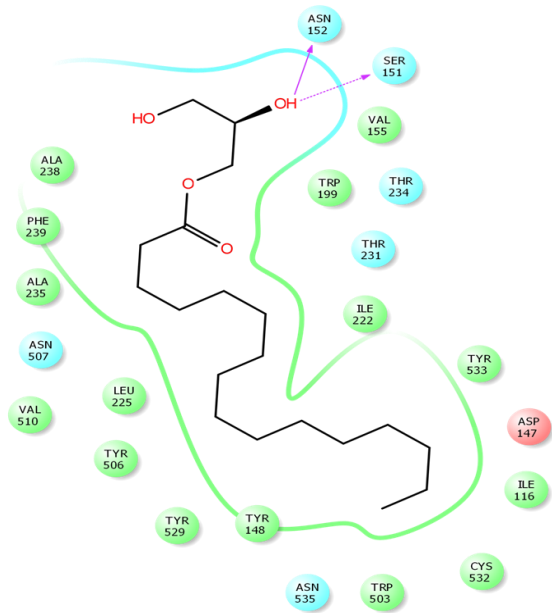

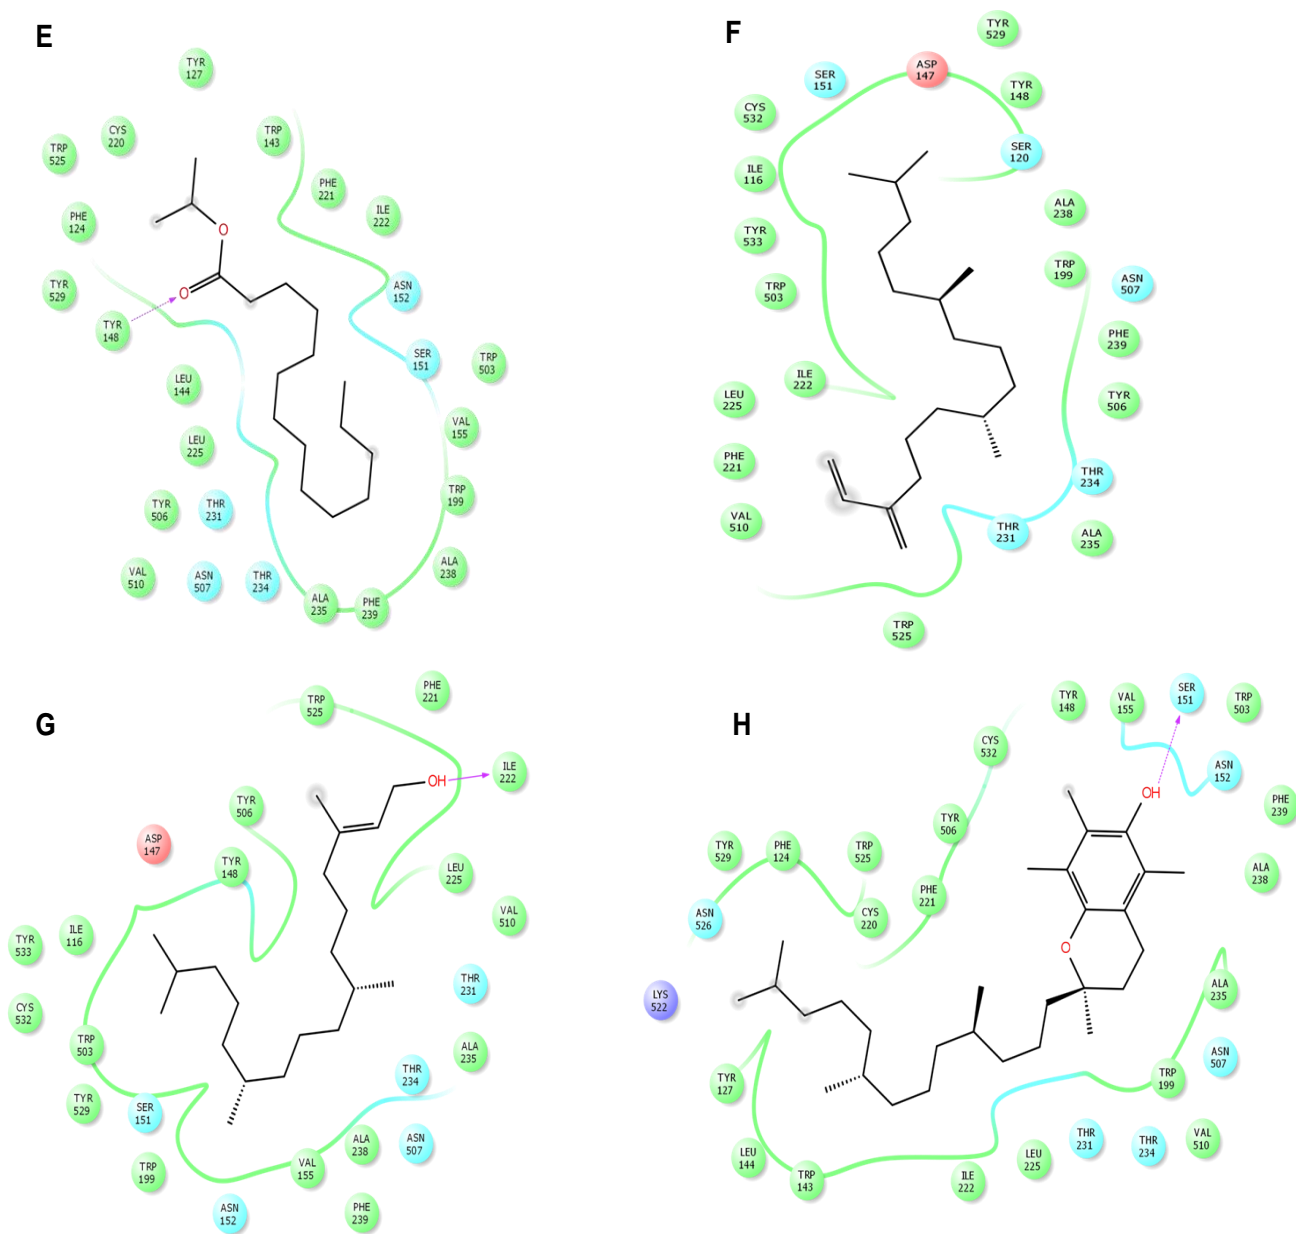

**Figure S1.** 2D interactions of the best fit found for (A) Loliolide, (B) Ethyl linolenate, (C) Methyl linoleate, (D) 2-Palmitoylglycerol, (E) Methyl palmitate, (F) Neophytadiene, (G) Phytol, and (H) Vitamin E docked to the M3 muscarinic acetylcholine receptor (PDB ID: 4U14). Colors indicate the residue (or species) type: Red-acidic (Asp, Glu), Green-hydrophobic (Ala, Val,Ile, Leu, Tyr, Phe, Trp, Met, Cys, Pro), Purple-basic (Hip, Lys, Arg), Blue-polar (Ser, Thr, Gln, Asn, His, Hie, Hid), Light gray-other (Gly, water) and Darker gray-metal atoms. Interactions with the protein are marked with lines between ligand atoms and protein residues: Solid pink: H-bonds to the protein backbone, Dotted pink: H-bonds to protein side chains, Green: pi-pi stacking interactions, Orange: pi-cation interactions. Ligand atoms exposed to solvent are marked with gray spheres. The protein “pocket” is displayed with a line around the ligand, colored with the color of the nearest protein residue. The gap in the line shows the opening of the pocket.

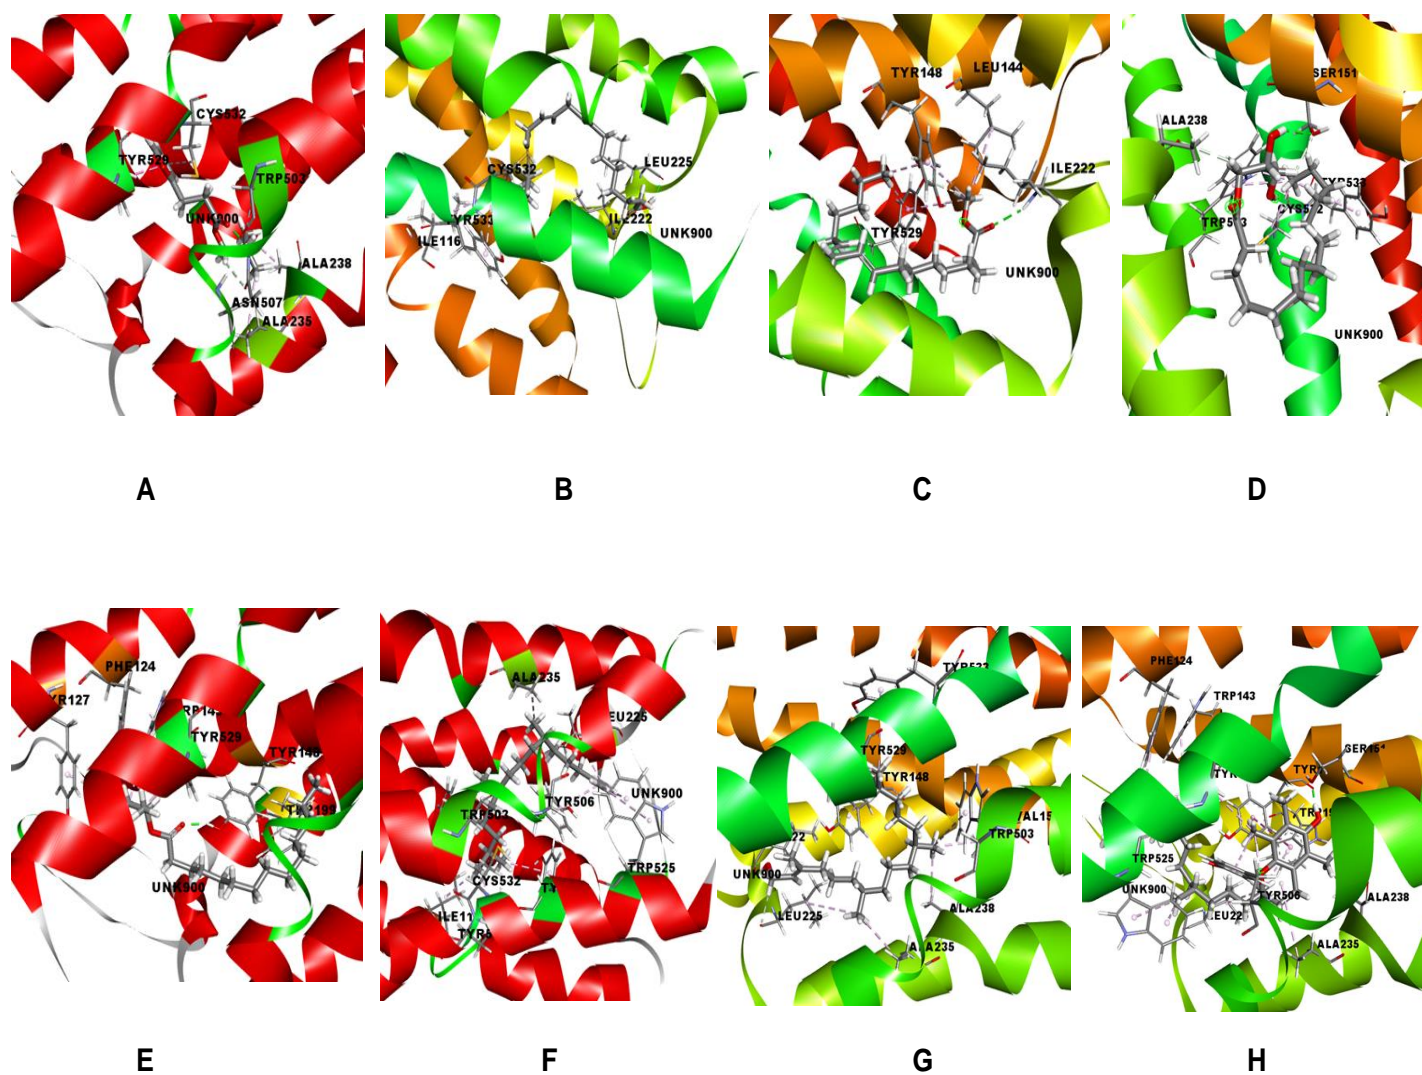

**Figure S2.** Best ranked fit of (A) Loliolide, (B) Ethyl linolenate, (C) Methyl linoleate, (D) 2-Palmitoylglycerol, (E) Methyl palmitate, (F) Neophytadiene, (G) Phytol and (H) Vitamin E in the binding pocket of the M3 muscarinic acetylcholine receptor (PDB ID: 4U14).

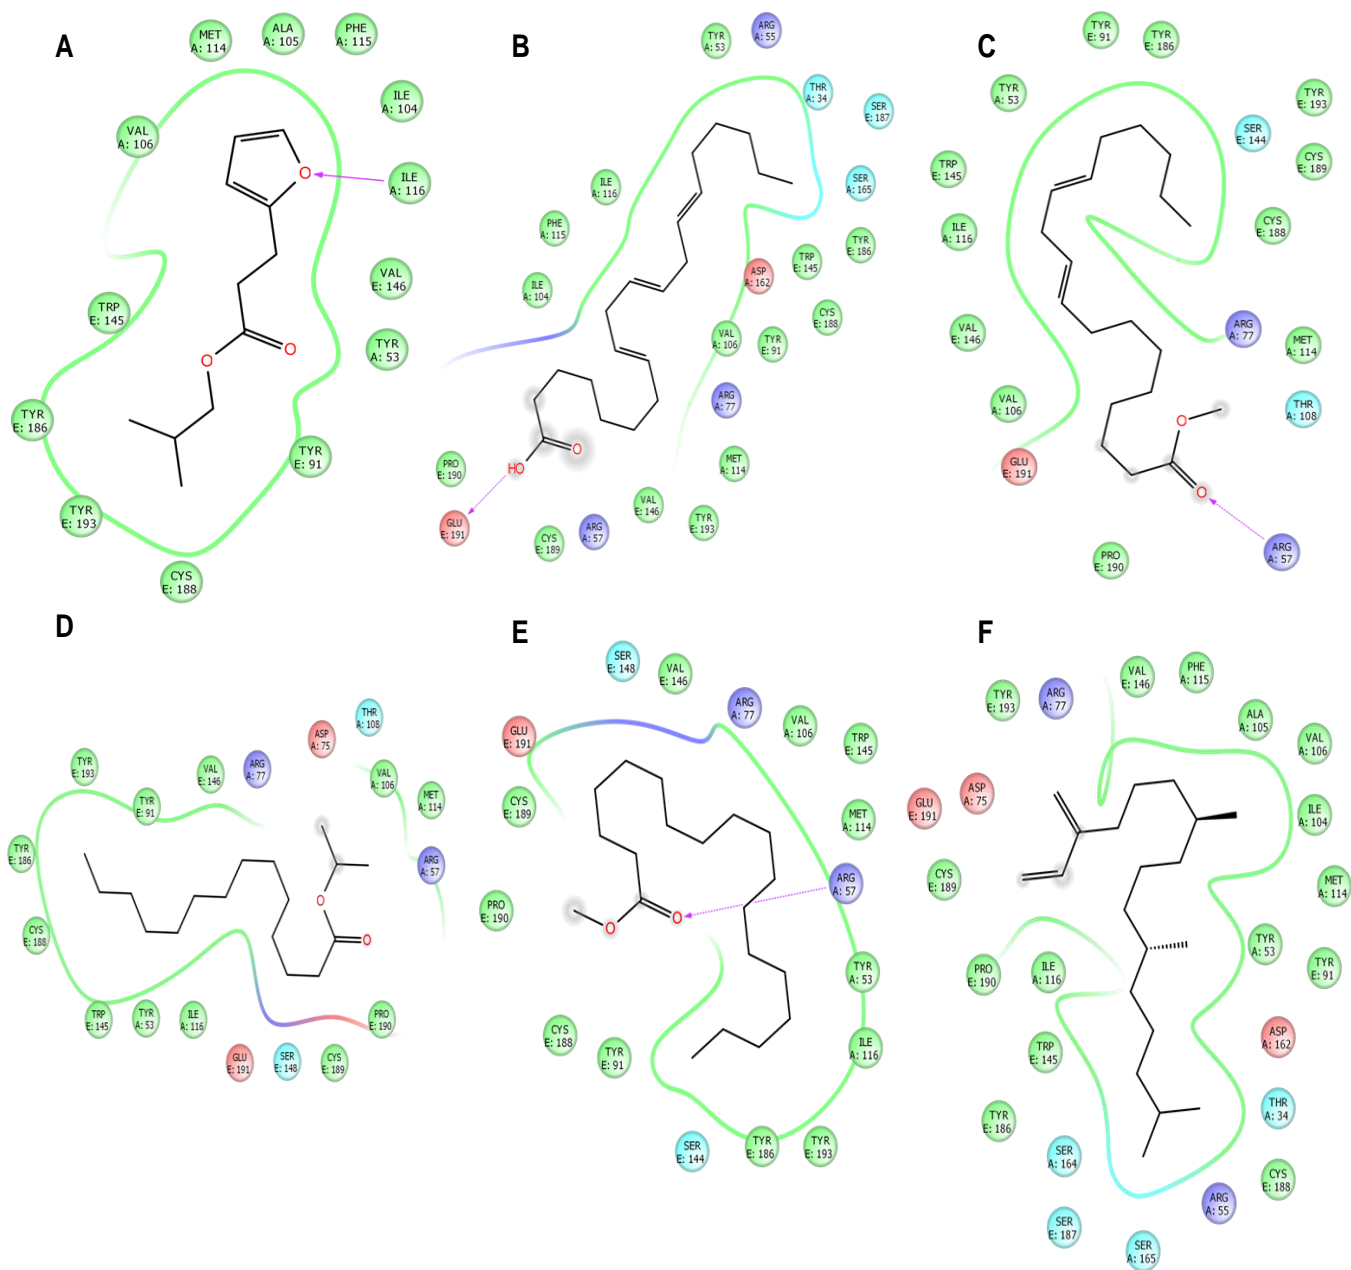

**Figure S3.** 2D interactions of the best fit found for (A) Lolilide, (B) Ethyl linolenate, (C) Methyl linoleate, (D) Methyl palmitate, (E) Methyl stearate and (F) Neophytadiene docked to the 5-HT<sub>3</sub> receptor (PDB ID: 5AIN).

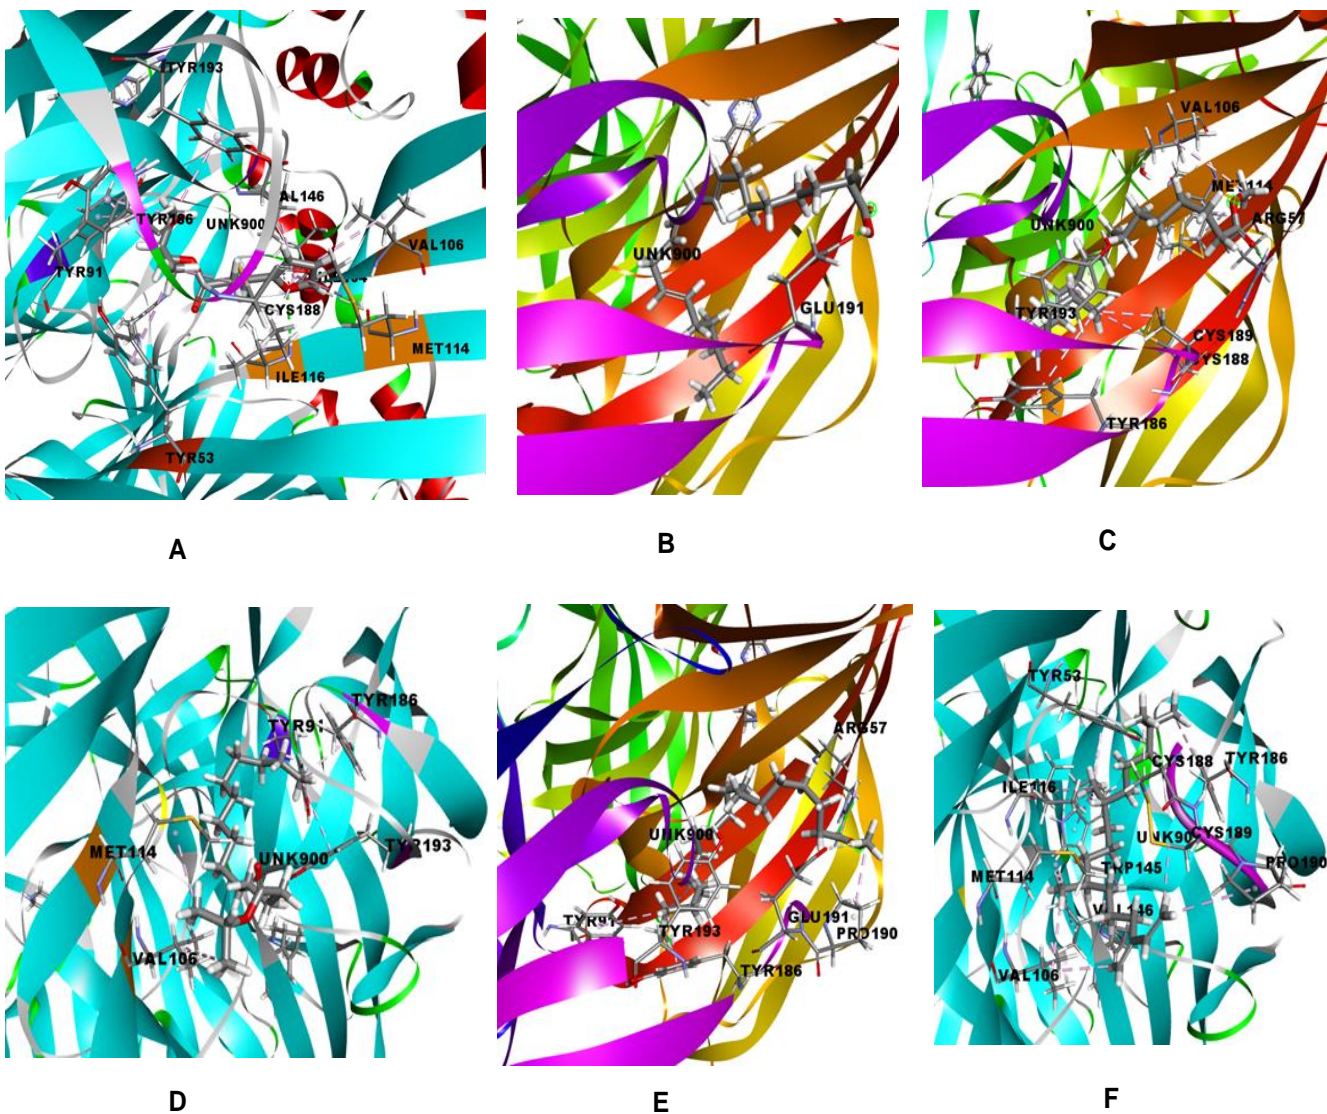

**Figure S4.** Best ranked fit of (A) Loliolide, (B) Ethyl linolenate, (C) Methyl linoleate, (D) Methyl palmitate, (E) Methyl stearate and (F) Neophytadiene in the binding pocket of the 5-HT3 receptor (PDB ID: 5AIN).

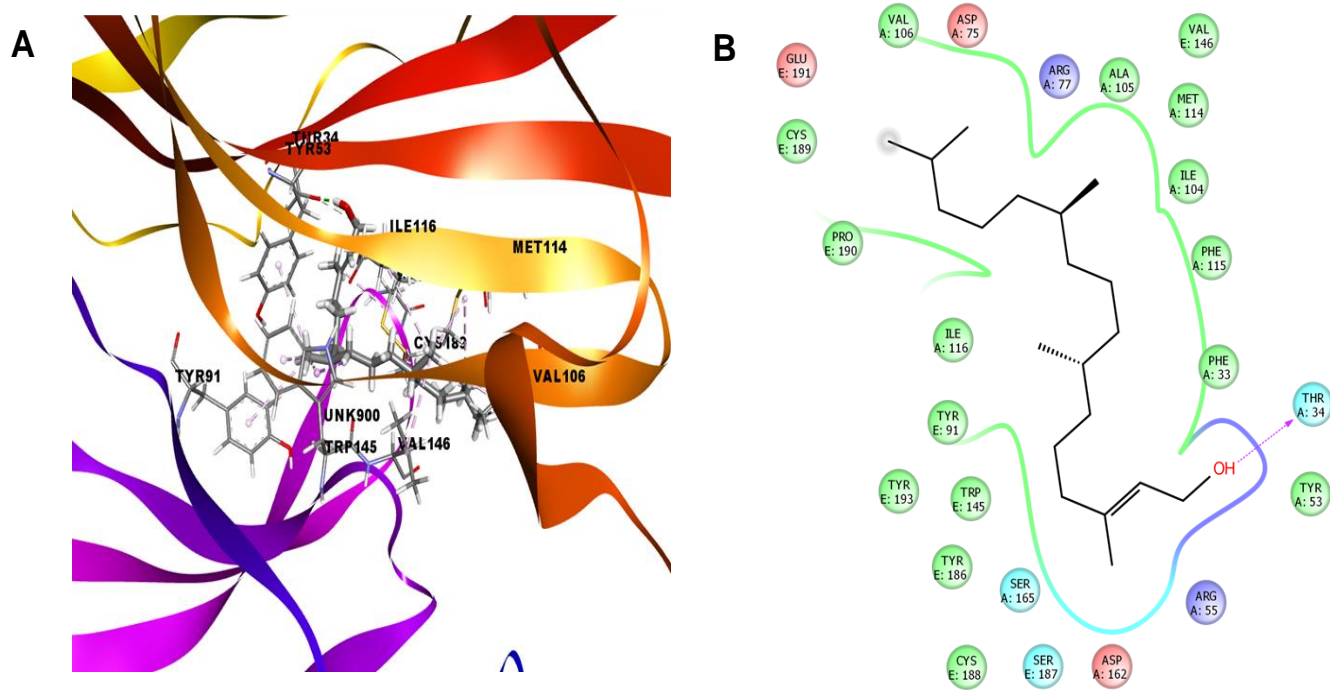

**Figure S5.** Best ranked fit of Phytol (A) in the binding pocket of 5-HT<sub>3</sub> (PDB ID: 5AIN) and 2D representation of key interactions in the binding pocket for Phytol (B).

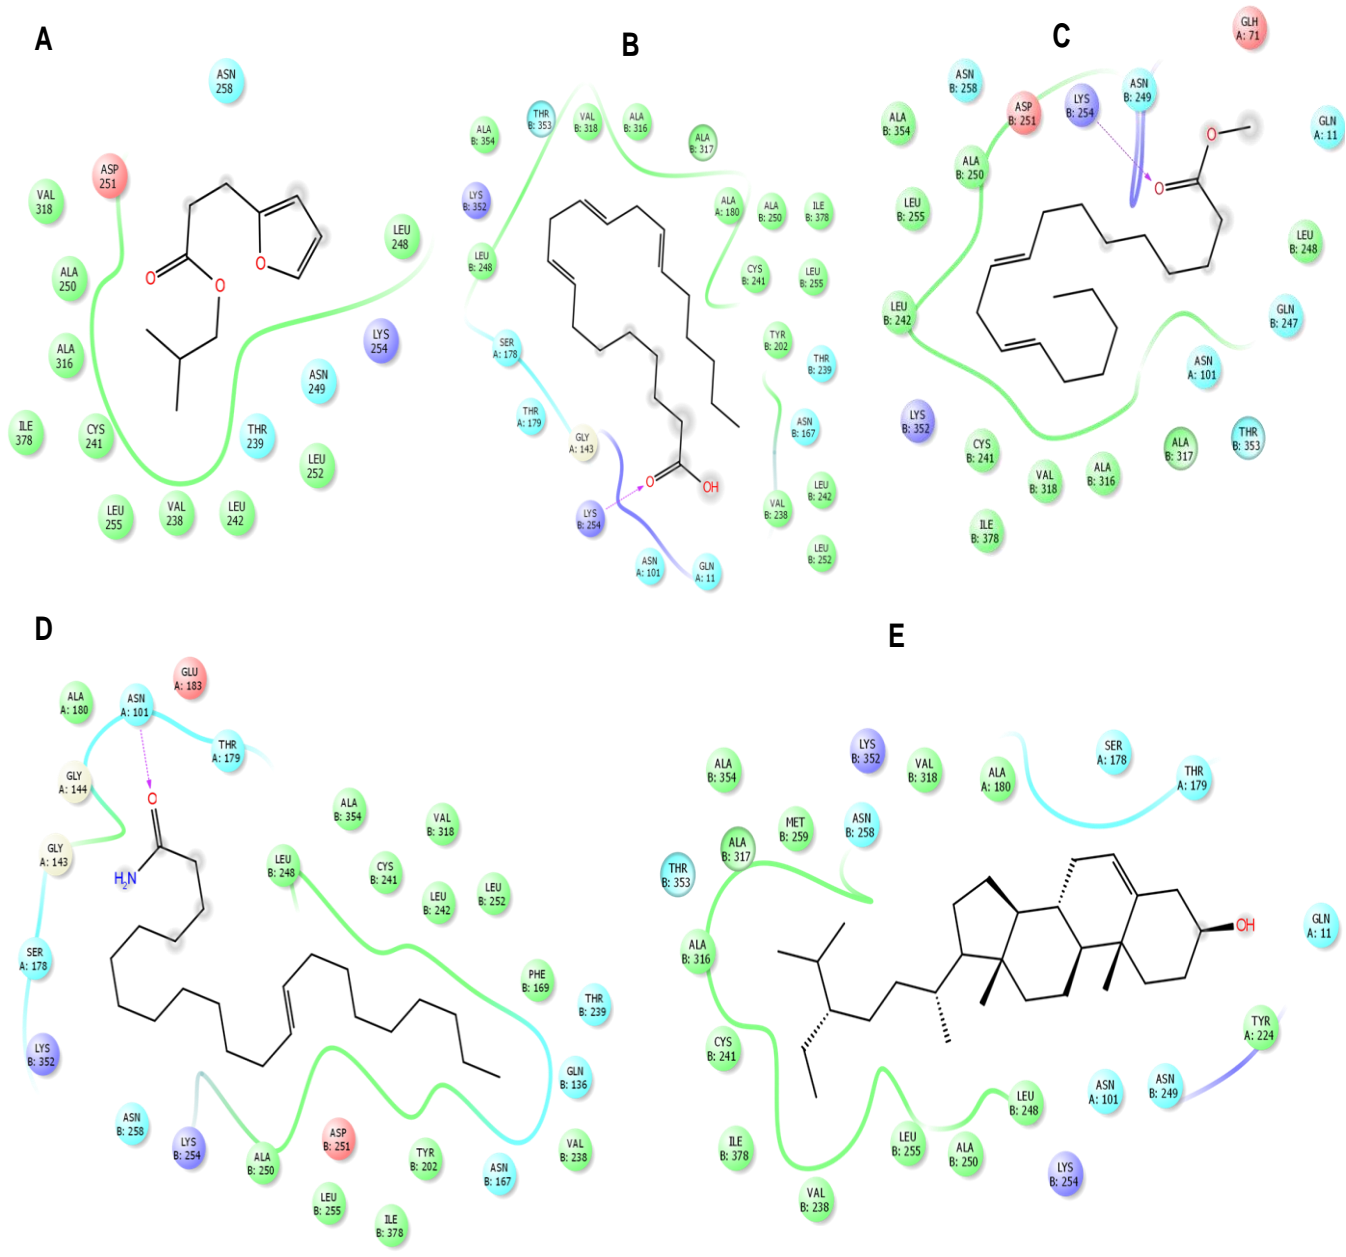



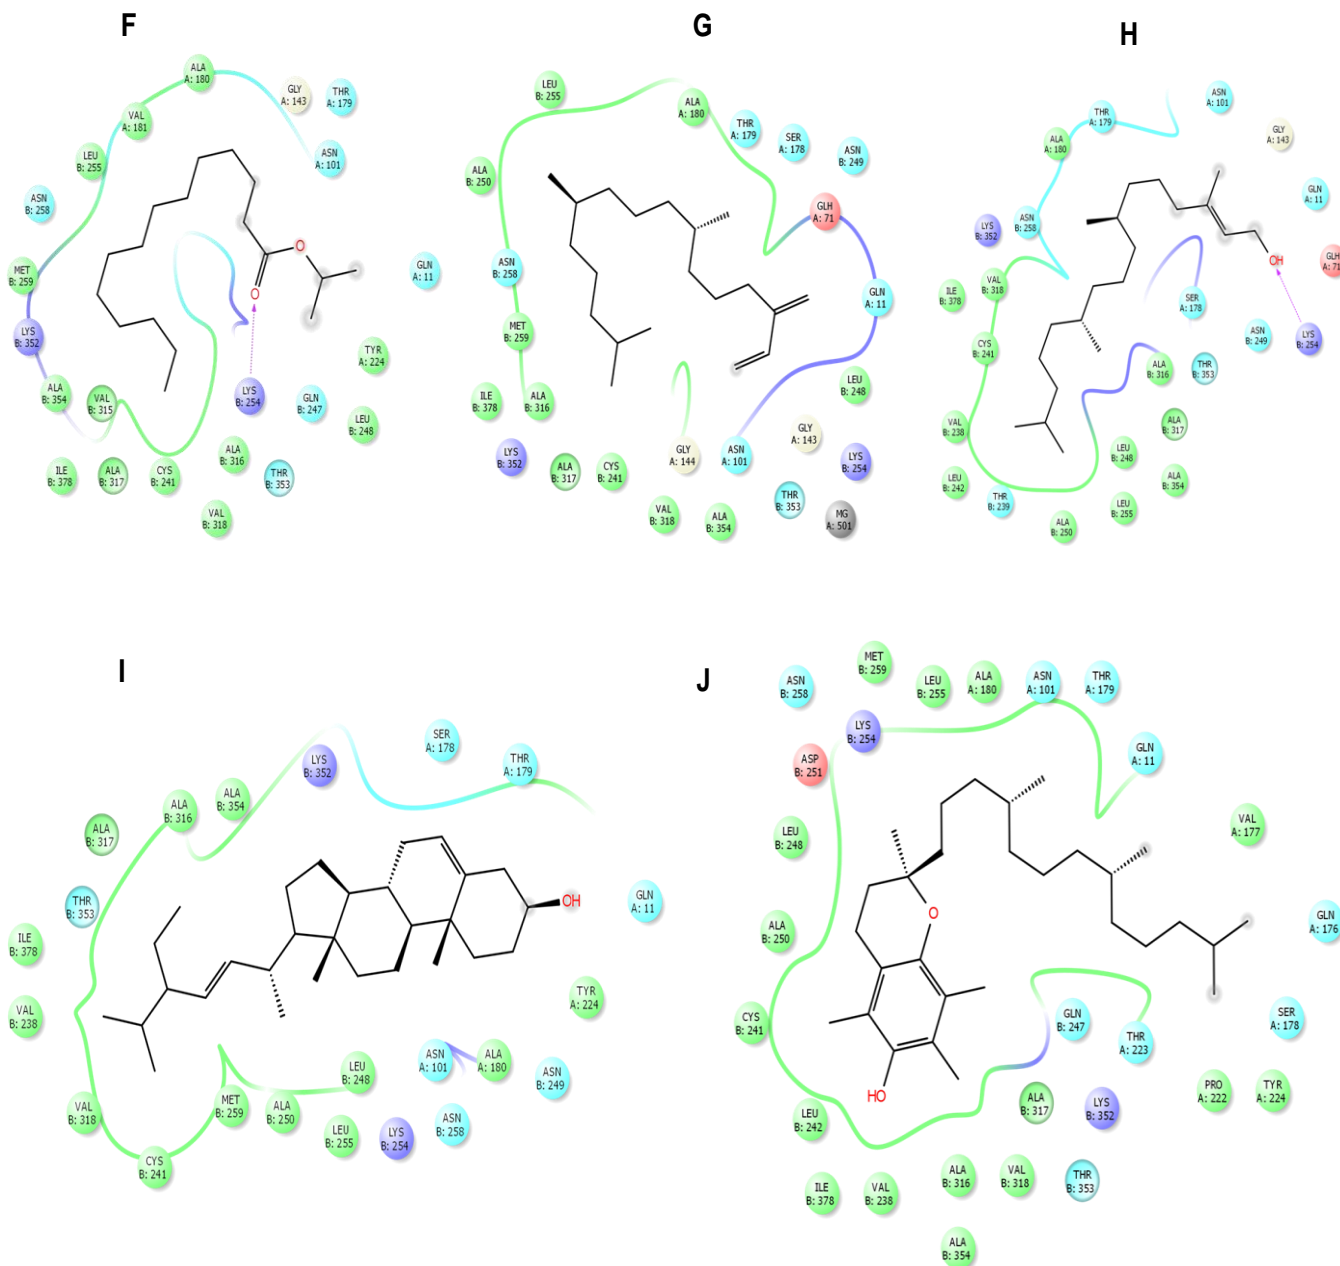

**Figure S6.** 2D interactions of the best fit found for (A) Lolilide, (B) Ethyl linolenate, (C) Methyl linoleate, (D) Erucamide, (E) gamma-Sitosterol, (F) Methyl palmitate, (G) Neophytadiene, (H) Phytol, (I) Stigmasterol and (J) Vitamin E docked to tubulin (PDB ID: 1SA0).

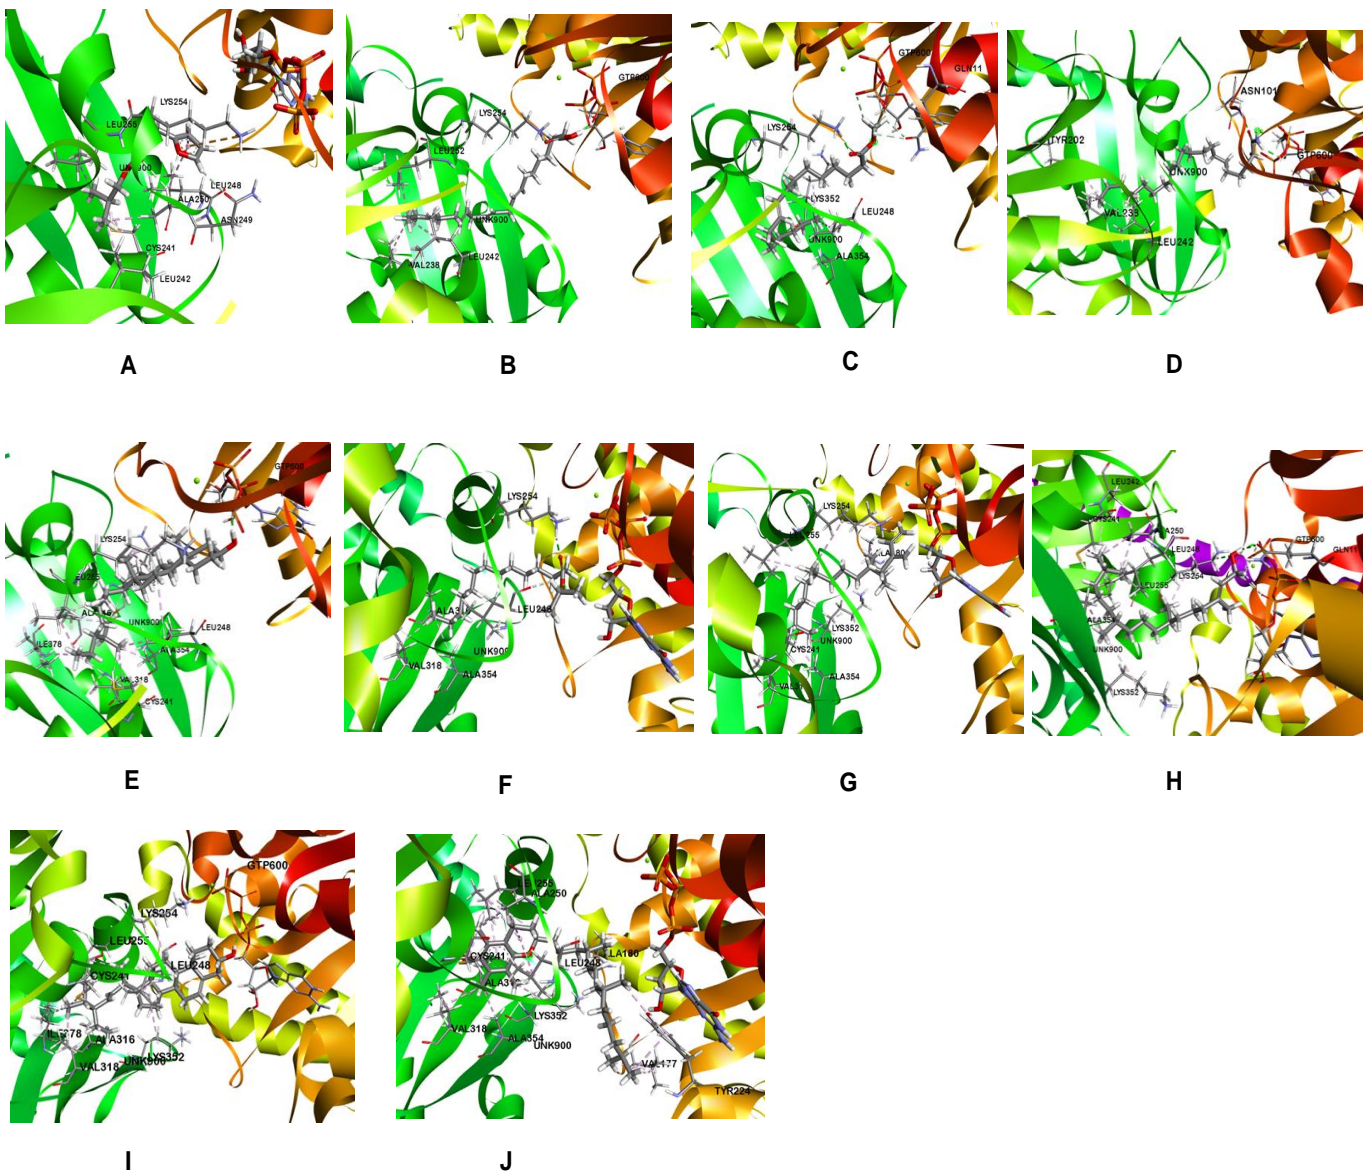

**Figure S7.** Best ranked fit of (A) Loliolide, (B) Ethyl linolenate, (C) Methyl linoleate, (D) Erucamide, (E) gamma-Sitosterol, (F) Methyl palmitate, (G) Neophytadiene, (H) Phytol, (I) Stigmasterol and (J) Vitamin E in the binding pocket of tubulin (PDB ID: 1SA0).





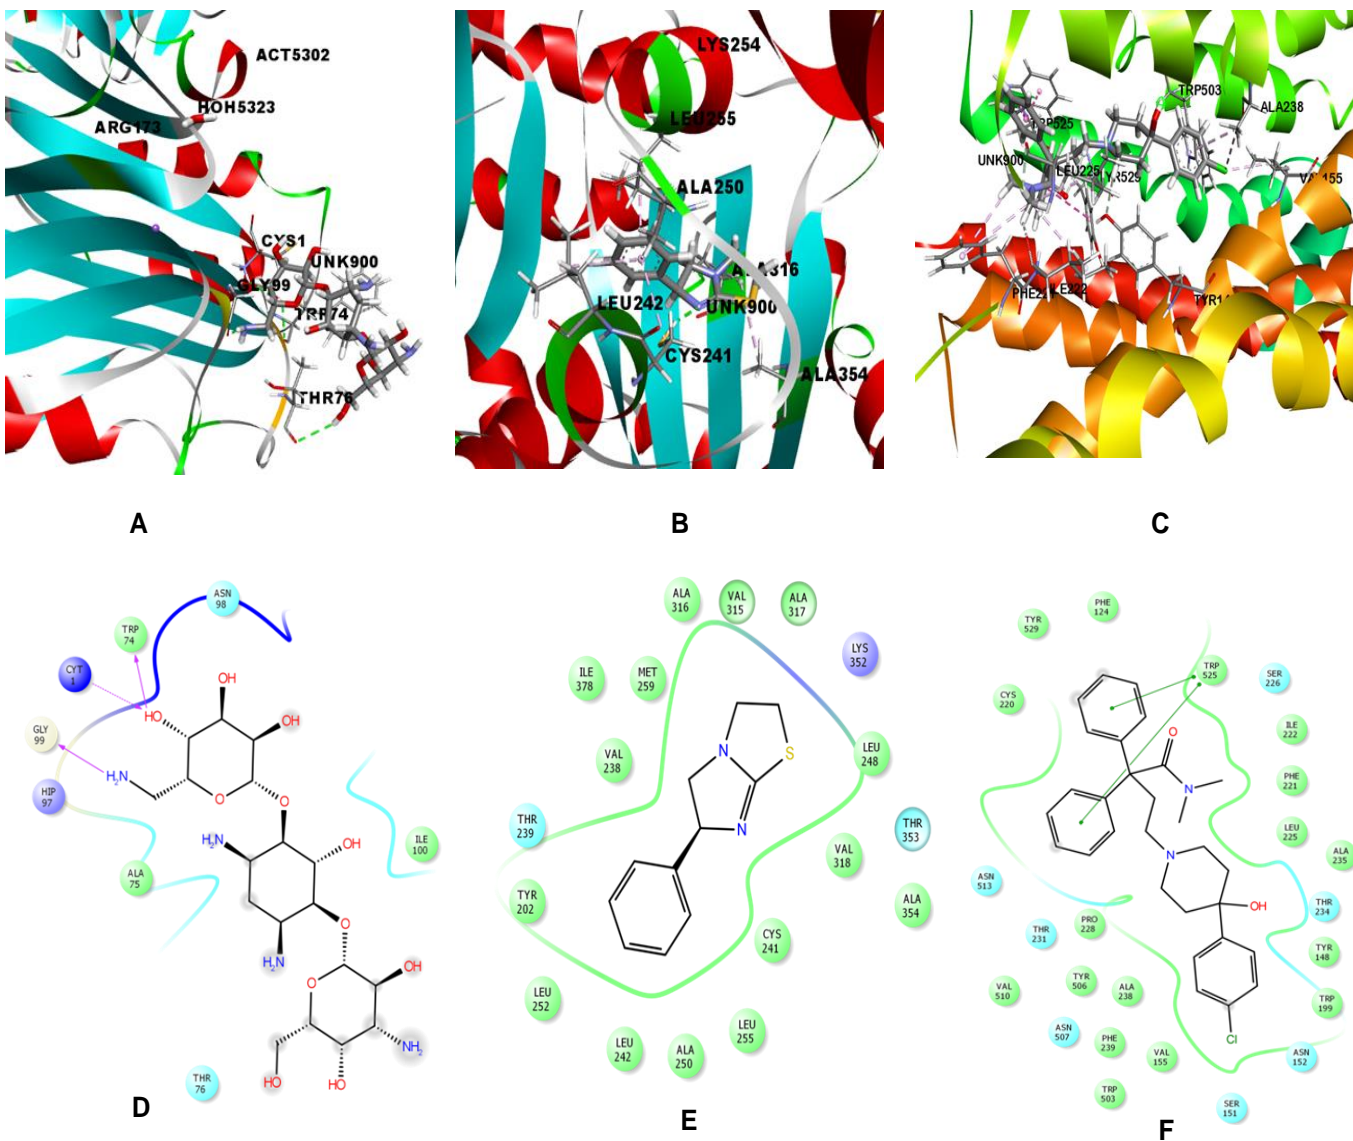

**Figure S10.** (A) Best fit and (D) 2D interaction diagram of Kanamycin docked at the binding pocket of GlcN-6-P synthase (PDB ID: 1XFF). (B) Best fit and (E) 2D interaction diagram of Levamisole docked at the binding pocket of tubulin (PDB ID: 1SA0). (C) Best fit and (F) 2D interaction diagram of Loperamide docked at the binding pocket of M3 muscarinic acetylcholine receptor (PDB ID: 4U14).
